# Supplementary material for: High density array screening to identify the genetic requirements for transition metal tolerance in Saccharomyces cerevisiae
Source: Royal Society of Chemistry journal article supplement (doi:10.1039/c0mt00035c), 2011-01-01
Supplement: c0mt00035cdata1.pdf [file c0mt00035cdata1.pdf]

**Supplementary data 1.** Microsoft excel file containing the lists of gene deletions determined to be sensitive to each metal. Gene functions listed and taken from [www.yeastgenome.org](http://www.yeastgenome.org).

| GENE  | RATIO       | P-VALUE     | FUNCTION                                                                                                                                                                                                                                        |
|-------|-------------|-------------|-------------------------------------------------------------------------------------------------------------------------------------------------------------------------------------------------------------------------------------------------|
| AAT2  | 0.279409892 | 0.004466638 | Cytosolic aspartate aminotransferase, involved in nitrogen metabolism; localizes to peroxisomes in oleate-grown cells                                                                                                                           |
| ABM1  | 0.439672485 | 1.63188E-11 | Protein of unknown function, required for normal microtubule organization                                                                                                                                                                       |
| ADK1  | 0.342970399 | 0           | Adenylate kinase, required for purine metabolism; localized to the cytoplasm and the mitochondria; lacks cleavable signal sequence                                                                                                              |
| AFT1  | 0.062296826 | 0           | Transcription factor involved in iron utilization and homeostasis                                                                                                                                                                               |
| ALG9  | 0.383502637 | 0           | Mannosyltransferase, involved in N-linked glycosylation; catalyzes the transfer of mannose from Dol-P-Man to lipid-linked oligosaccharides                                                                                                      |
| APQ12 | 0.140645221 | 0           | Protein involved in nucleocytoplasmic transport of mRNA                                                                                                                                                                                         |
| ARE1  | 0.317873164 | 0           | Acyl-CoA:sterol acyltransferase, isozyme of Are2p; endoplasmic reticulum enzyme that contributes the major sterol esterification activity in the absence of oxygen                                                                              |
| ARF1  | 0.151197323 | 0           | ADP-ribosylation factor, GTPase of the Ras superfamily involved in regulation of coated vesicle formation in intracellular trafficking within the Golgi; functionally interchangeable with Arf2p                                                |
| ARL1  | 0.281441505 | 0           | Soluble GTPase with a role in regulation of membrane traffic; regulates potassium influx;                                                                                                                                                       |
| ARO1  | 0.263396129 | 1.36807E-10 | Pentafunctional arom protein, catalyzes steps 2 through 6 in the biosynthesis of chorismate, which is a precursor to aromatic amino acids                                                                                                       |
| ARO2  | 0.469966873 | 3.08309E-13 | Bifunctional chorismate synthase and flavin reductase, catalyzes the conversion of 5-enolpyruvylshikimate 3-phosphate (EPSP) to form chorismate, which is a precursor to aromatic amino acids                                                   |
| ARO7  | 0.182867439 | 0           | Chorismate mutase, catalyzes the conversion of chorismate to prephenate to initiate the tyrosine/phenylalanine-specific branch of aromatic amino acid biosynthesis                                                                              |
| ASH1  | 0.315272509 | 0           | Zinc-finger inhibitor of HO transcription; mRNA is localized and translated in the distal tip of anaphase cells, resulting in accumulation of Ash1p in daughter cell nuclei and inhibition of HO expression;                                    |
| ATG11 | 0.159818    | 0           | Adapter protein for pexophagy and the cytoplasm-to-vacuole targeting (Cvt) pathway                                                                                                                                                              |
| ATG22 | 0.422863037 | 7.73248E-06 | Vacuolar integral membrane protein required for efflux of amino acids during autophagic body breakdown in the vacuole                                                                                                                           |
| ATX1  | 0.308917665 | 0           | Cytosolic copper metallochaperone that transports copper to the secretory vesicle copper transporter Ccc2p for eventual insertion into Fet3p                                                                                                    |
| BRO1  | 0.387336235 | 0.001747918 | Cytoplasmic class E vacuolar protein sorting (VPS) factor that coordinates deubiquitination in the multivesicular body (MVB) pathway by recruiting Doa4p to endosomes                                                                           |
| BUB3  | 0.225721485 | 1.1706E-06  | Kinetochore checkpoint WD40 repeat protein that localizes to kinetochores during prophase and metaphase, delays anaphase in the presence of unattached kinetochores;                                                                            |
| CAC2  | 0.239059372 | 0           | Component of the chromatin assembly complex (with Rif2p and Msi1p) that assembles newly synthesized histones onto recently replicated DNA, required for building functional kinetochores, conserved from yeast to humans                        |
| CCC2  | 0.05341047  | 0           | Cu(+2)-transporting P-type ATPase, required for export of copper from the cytosol into an extracytosolic compartment                                                                                                                            |
| CCR4  | 0.199875288 | 7.55951E-13 | Component of the CCR4-NOT transcriptional complex, which is involved in regulation of gene expression                                                                                                                                           |
| CCS1  | 0.132569633 | 0           | Copper chaperone for superoxide dismutase Sod1p, involved in oxidative stress protection                                                                                                                                                        |
| CDC50 | 0.051960042 | 0           | Endosomal protein that regulates cell polarity, controls polarized growth; similar to Ynr048wp and Lem3p                                                                                                                                        |
| CIK1  | 0.199109159 | 0           | Kinesin-associated protein required for both karyogamy and mitotic spindle organization                                                                                                                                                         |
| CIN5  | 0.207100244 | 0           | Basic leucine zipper (bZIP) transcriptional factor of the yAP-1 family that mediates pleiotropic drug resistance and salt tolerance                                                                                                             |
| CKB1  | 0.428123948 | 6.68698E-12 | Beta regulatory subunit of casein kinase 2, a Ser/Thr protein kinase with roles in cell growth and proliferation                                                                                                                                |
| CKB2  | 0.279212406 | 0           | Beta' regulatory subunit of casein kinase 2, a Ser/Thr protein kinase with roles in cell growth and proliferation;                                                                                                                              |
| COG6  | 0.482671959 | 0           | Component of the conserved oligomeric Golgi complex (Cog1p through Cog8p), a cytosolic tethering complex that functions in protein trafficking to mediate fusion of transport vesicles to Golgi compartments                                    |
| COT1  | 0.113326701 | 0           | Vacuolar transporter that mediates zinc transport into the vacuole; overexpression confers resistance to cobalt and rhodium                                                                                                                     |
| CUE1  | 0.268208256 | 5.7664E-08  | Endoplasmic reticulum membrane protein that recruits the ubiquitin-conjugating enzyme Ubc7p to the ER where it functions in protein degradation;                                                                                                |
| CYS3  | 0.33869265  | 0           | Cystathionine gamma-lyase, catalyzes one of the two reactions involved in the transsulfuration pathway that yields cysteine from homocysteine with the intermediary formation of cystathionine                                                  |
| CYS4  | 0.150886314 | 0           | Cystathionine beta-synthase, catalyzes the synthesis of cystathionine from serine and homocysteine, the first committed step in cysteine biosynthesis                                                                                           |
| DBF2  | 0.318606726 | 0           | Ser/Thr kinase involved in transcription and stress response; functions as part of a network of genes in exit from mitosis                                                                                                                      |
| DCW1  | 0.387328029 | 2.22045E-16 | Putative mannosidase, GPI-anchored membrane protein required for cell wall biosynthesis in bud formation;homologous to Dfg5p                                                                                                                    |
| DEF1  | 0.085581367 | 0           | RNAPII degradation factor, forms a complex with Rad26p in chromatin                                                                                                                                                                             |
| DEG1  | 0.309417996 | 3.35393E-06 | Non-essential tRNA:pseudouridine synthase, introduces pseudouridines at position 38 or 39 in tRNA, important for maintenance of translation efficiency and normal cell growth                                                                   |
| DEM1  | 0.236241357 | 0.000304753 | Mitochondrial protein of unknown function                                                                                                                                                                                                       |
| DHH1  | 0.258846878 | 2.02162E-09 | Cytoplasmic DExD/H-box helicase, stimulates mRNA decapping, coordinates distinct steps in mRNA function and decay, interacts with both the decapping and deadenylase complexes, may have a role in mRNA export and translation                  |
| DID2  | 0.417910377 | 2.20291E-07 | Class E protein of the vacuolar protein-sorting (Vps) pathway                                                                                                                                                                                   |
| DID4  | 0.219020007 | 0           | Class E Vps protein of the ESCRT-III complex, required for sorting of integral membrane proteins into luminal vesicles of multivesicular bodies, and for delivery of newly synthesized vacuolar enzymes to the vacuole, involved in endocytosis |
| DOA1  | 0.336070159 | 0           | WD repeat protein required for ubiquitin-mediated protein degradation, forms complex with Cdc48p, plays a role in controlling cellular ubiquitin concentration; also promotes efficient NHEJ in postdiauxic/stationary phase                    |
| DOA4  | 0.224372379 | 5.66069E-12 | Ubiquitin isopeptidase, required for recycling ubiquitin from proteasome-bound ubiquitinated intermediates, acts at the late endosome/prevacuolar compartment to recover ubiquitin from ubiquitinated membrane proteins en route to the vacuole |
| DRS2  | 0.061940993 | 0           | Aminophospholipid translocase (flippase) that maintains membrane lipid asymmetry in post-Golgi secretory vesicles; contributes to clathrin-coated vesicle formation and endocytosis; mutations in human homolog ATP8B1 result in liver disease  |
| EAP1  | 0.203992034 | 0           | eIF4E-associated protein, binds eIF4E and inhibits cap-dependent translation, also functions independently of eIF4E to maintain genetic stability; plays a role in cell growth, implicated in the TOR signaling cascade                         |
| ELM1  | 0.260853899 | 4.79727E-13 | Serine/threonine protein kinase that regulates cellular morphogenesis, septin behavior, and cytokinesis;                                                                                                                                        |
| ERG3  | 0.268039707 | 0           | C-5 sterol desaturase, catalyzes the introduction of a C-5(6) double bond into episterol, a precursor in ergosterol biosynthesis                                                                                                                |
| FAB1  | 0.286476877 | 0           | 1-phosphatidylinositol-3-phosphate 5-kinase; vacuolar membrane kinase that generates phosphatidylinositol (3,5)P2, which is involved in vacuolar sorting and homeostasis                                                                        |
| FET3  | 0.056132816 | 0           | Ferro-O2-oxidoreductase required for high-affinity iron uptake and involved in mediating resistance to copper ion toxicity                                                                                                                      |
| FRE1  | 0.325845098 | 8.0591E-07  | Ferric reductase and cupric reductase, reduces siderophore-bound iron and oxidized copper prior to uptake by transporters                                                                                                                       |
| FTR1  | 0.0530946   | 0           | High affinity iron permease involved in the transport of iron across the plasma membrane;                                                                                                                                                       |
| FYV6  | 0.246814248 | 0           | Protein of unknown function, required for survival upon exposure to K1 killer toxin; proposed to regulate double-strand break repair via non-homologous end-joining                                                                             |
| GEF1  | 0.124293176 | 0           | Voltage-gated chloride channel localized to the golgi, the endosomal system, and plasma membrane, and involved in cation homeostasis                                                                                                            |
| GLO4  | 0.430660428 | 0           | Mitochondrial glyoxalase II, catalyzes the hydrolysis of S-D-lactoylglutathione into glutathione and D-lactate                                                                                                                                  |
| GYP1  | 0.135924681 | 0           | Cis-golgi GTPase-activating protein (GAP) for the Rab family members Ypt1p (in vivo) and for Ypt1p, Sec4p, Ypt7p, and Ypt51p (in vitro); involved in vesicle docking and fusion                                                                 |
| HNM1  | 0.382853462 | 0.000523312 | Choline/ethanolamine transporter; involved in the uptake of nitrogen mustard and the uptake of glycine betaine during hypersaline stress;                                                                                                       |
| HPF1  | 0.169717218 | 0           | Haze-protective mannoprotein that reduces the particle size of aggregated proteins in white wines                                                                                                                                               |
| HSL7  | 0.478564132 | 0           | Protein arginine N-methyltransferase that exhibits septin and Hsl1p-dependent bud neck localization and periodic Hsl1p-dependent phosphorylation; required along with Hsl1p for bud neck recruitment, phosphorylation, and degradation of Swe1p |
| ICE2  | 0.292373261 | 0           | Integral ER membrane protein with type-III transmembrane domains; mutations cause defects in cortical ER morphology in both the mother and daughter cells                                                                                       |
| IRS4  | 0.147470028 | 0           | EH domain-containing protein involved in regulating phosphatidylinositol 4,5-bisphosphate levels and autophagy                                                                                                                                  |
| KEM1  | 0.173143986 | 0           | Evolutionarily-conserved 5'-3' exonuclease component of cytoplasmic processing (P) bodies involved in mRNA decay; plays a role in microtubule-mediated processes, filamentous growth, ribosomal RNA maturation, and telomere maintenance        |
| KEX2  | 0.1342448   | 0           | Subtilisin-like protease (proprotein convertase), a calcium-dependent serine protease involved in the activation of proproteins of the secretory pathway                                                                                        |
| KRE1  | 0.267064072 | 0           | Cell wall glycoprotein involved in beta-glucan assembly                                                                                                                                                                                         |
| KTI12 | 0.218078962 | 0           | Protein that plays a role, with Elongator complex, in modification of wobble nucleosides in tRNA; involved in sensitivity to G1 arrest induced by zymocin; interacts with chromatin throughout the genome                                       |
| MAC1  | 0.24588381  | 0           | Copper-sensing transcription factor involved in regulation of genes required for high affinity copper transport                                                                                                                                 |
| MCH5  | 0.217193108 | 0           | Plasma membrane riboflavin transporter; facilitates the uptake of vitamin B2; required for FAD-dependent processes                                                                                                                              |
| MDM10 | 0.313651742 | 2.44249E-15 | Subunit of both the Mdm10-Mdm12-Mmm1 complex and the mitochondrial sorting and assembly machinery (SAM complex);                                                                                                                                |
| MDM12 | 0.303310567 | 0           | Mitochondrial outer membrane protein, required for transmission of mitochondria to daughter cells;                                                                                                                                              |
| MGA2  | 0.13881104  | 0           | ER membrane protein involved in regulation of OLE1 transcription                                                                                                                                                                                |
| MGR2  | 0.28300121  | 1.73676E-10 | Protein required for growth of cells lacking the mitochondrial genome                                                                                                                                                                           |
| MIC17 | 0.154549516 | 0           | Mitochondrial intermembrane space cysteine motif protein;                                                                                                                                                                                       |
| MID1  | 0.291880046 | 1.57763E-13 | N-glycosylated integral membrane protein of the ER membrane and plasma membrane, functions as a stretch-activated Ca2+-permeable cation channel required for Ca2+ influx stimulated by pheromone                                                |
| MNN10 | 0.349173363 | 0           | Subunit of a Golgi mannosyltransferase complex also containing Anp1p, Mnn9p, Mnn11p, and Hoc1p that mediates elongation of the polysaccharide mannan backbone                                                                                   |
| MNN11 | 0.33671476  | 0.000101918 | Subunit of a Golgi mannosyltransferase complex that also contains Anp1p, Mnn9p, Mnn10p, and Hoc1p, and mediates elongation of the polysaccharide mannan backbone;                                                                               |

|        |              |             |                                                                                                                                                                                                                                                 |
|--------|--------------|-------------|-------------------------------------------------------------------------------------------------------------------------------------------------------------------------------------------------------------------------------------------------|
| MON1   | 0.044743917  | 0           | Protein required for fusion of cvt-vesicles and autophagosomes with the vacuole                                                                                                                                                                 |
| MRE11  | 0.135650265  | 0           | Subunit of a complex with Rad50p and Xrs2p (MRX complex) that functions in repair of DNA double-strand breaks and in telomere stability, exhibits nuclease activity that appears to be required for MRX function; widely conserved              |
| MRP1   | 0.15769405   | 0.000229571 | Mitochondrial ribosomal protein of the small subunit                                                                                                                                                                                            |
| MRPL3  | 0.077505102  | 0           | Mitochondrial ribosomal protein of the large subunit                                                                                                                                                                                            |
| MRPL36 | 0.316419181  | 1.89959E-08 | Mitochondrial ribosomal protein of the large subunit                                                                                                                                                                                            |
| MRPL7  | 0.373995029  | 1.96065E-06 | Mitochondrial ribosomal protein of the large subunit                                                                                                                                                                                            |
| MRPS5  | 0.121448173  | 0           | overlaps the verified gene MRPL38                                                                                                                                                                                                               |
| MRPS8  | 0.443740131  | 0           | Mitochondrial ribosomal protein of the small subunit                                                                                                                                                                                            |
| MTD1   | 0.45481692   | 1.1969E-07  | NAD-dependent 5,10-methylenetetrahydrofolate dehydrogenase, plays a catalytic role in oxidation of cytoplasmic one-carbon units                                                                                                                 |
| MTG1   | 0.430890615  | 2.15294E-05 | Peripheral GTPase of the mitochondrial inner membrane, essential for respiratory competence, likely functions in assembly of the large ribosomal subunit, has homologs in plants and animals                                                    |
| NBP2   | 0.407021937  | 0           | Protein involved in the HOG (high osmolarity glycerol) pathway, negatively regulates Hog1p by recruitment of phosphatase Ptc1p the Pbs2p-Hog1p complex, found in the nucleus and cytoplasm, contains an SH3 domain that binds Pbs2p             |
| NCS2   | 0.216062217  | 0           | Protein required for thiolation of the uridine at the wobble position of Lys(UUU) and Glu(UUC) tRNAs; has a role in urmylation and in invasive and pseudohyphal growth                                                                          |
| NCS6   | 0.448411954  | 0           | Protein required for thiolation of the uridine at the wobble position of Gln, Lys, and Glu tRNAs; has a role in urmylation and in invasive and pseudohyphal growth;                                                                             |
| NDE1   | 0.337616317  | 1.52995E-05 | Mitochondrial external NADH dehydrogenase, a type II NAD(P)H:quinone oxidoreductase that catalyzes the oxidation of cytosolic NADH                                                                                                              |
| NHX1   | 0.059384051  | 0           | Endosomal Na <sup>+</sup> /H <sup>+</sup> exchanger, required for intracellular sequestration of Na <sup>+</sup> ; required for osmotolerance to acute hypertonic shock                                                                         |
| NOP16  | 0.312386137  | 4.04099E-12 | Constituent of 66S pre-ribosomal particles, involved in 60S ribosomal subunit biogenesis                                                                                                                                                        |
| NUP188 | 0.251303205  | 0           | Subunit of the nuclear pore complex (NPC), involved in the structural organization of the complex and of the nuclear envelope                                                                                                                   |
| OPI8   | 0.46342933   | 1.53814E-10 | Dubious open reading frame, partially overlaps verified gene DID2                                                                                                                                                                               |
| OPT2   | 0.086217256  | 0           | Oligopeptide transporter; member of the OPT family                                                                                                                                                                                              |
| PDR16  | 0.363685965  | 1.28114E-10 | Phosphatidylinositol transfer protein (PITP) controlled by the multiple drug resistance regulator Pdr1p                                                                                                                                         |
| PEA2   | 0.347284322  | 4.8597E-10  | Coiled-coil polarisome protein required for polarized morphogenesis, cell fusion, and low affinity Ca <sup>2+</sup> influx; forms polarisome complex with Bni1p, Bud6p, and Spa2p; localizes to sites of polarized growth                       |
| PEP12  | 0.076081989  | 0           | Target membrane receptor (t-SNARE) for vesicular intermediates traveling between the Golgi apparatus and the vacuole                                                                                                                            |
| PFS1   | 0.241482008  | 0           | Sporulation protein required for prospore membrane formation at selected spindle pole                                                                                                                                                           |
| PHO86  | 0.148733568  | 0           | Endoplasmic reticulum (ER) resident protein required for ER exit of the high-affinity phosphate transporter Pho84p, specifically required for packaging of Pho84p into COPII vesicles                                                           |
| PHO88  | 0.222274299  | 9.64446E-09 | Probable membrane protein, involved in phosphate transport                                                                                                                                                                                      |
| PIL1   | 0.266144844  | 0           | Primary component of eisosomes, which are large immobile cell cortex structures associated with endocytosis                                                                                                                                     |
| PKR1   | 0.082922168  | 0           | V-ATPase assembly factor, functions with other V-ATPase assembly factors in the ER to efficiently assemble the V-ATPase membrane sector                                                                                                         |
| PLC1   | 0.360595592  | 0.000932711 | Phospholipase C, hydrolyzes phosphatidylinositol 4,5-bisphosphate (PIP2) to generate the signaling molecules inositol 1,4,5-triphosphate (IP3) and 1,2-diaclyglycerol (DAG); involved in regulating many cellular processes                     |
| POP2   | 0.143331799  | 0           | RNase of the DEDD superfamily, subunit of the Ccr4-Not complex that mediates 3' to 5' mRNA deadenylation                                                                                                                                        |
| PTC1   | 0.267004227  | 0           | Type 2C protein phosphatase (PP2C); inactivates the osmosensing MAPK cascade by dephosphorylating Hog1p                                                                                                                                         |
| PTC6   | 0.268692385  | 0           | Mitochondrial protein phosphatase of type 2C with similarity to mammalian PP1Ks                                                                                                                                                                 |
| PUB1   | 0.319797121  | 1.36511E-10 | Poly (A) <sup>+</sup> RNA-binding protein, abundant mRNP-component protein that binds mRNA and is required for stability of many mRNAs; component of glucose deprivation induced stress granules                                                |
| QRI8   | 0.268499902  | 0           | Ubiquitin conjugating enzyme, involved in the ER-associated protein degradation pathway; requires Cue1p for recruitment to the ER membrane                                                                                                      |
| RAV1   | 0.221476835  | 0           | Subunit of the RAVE complex (Rav1p, Rav2p, Skp1p), which promotes assembly of the V-ATPase holoenzyme                                                                                                                                           |
| RAV2   | 0.340028993  | 0           | Subunit of RAVE (Rav1p, Rav2p, Skp1p), a complex that associates with the V1 domain of the vacuolar membrane (H <sup>+</sup> )-ATPase (V-ATPase) and promotes assembly and reassembly of the holoenzyme                                         |
| RCY1   | 0.079114783  | 0           | F-box protein involved in recycling plasma membrane proteins internalized by endocytosis; localized to sites of polarized growth                                                                                                                |
| RHO4   | 0.167039182  | 0           | Non-essential small GTPase of the Rho/Rac subfamily of Ras-like proteins                                                                                                                                                                        |
| RIP1   | 0.138649209  | 0           | Ubiquinol-cytochrome-c reductase, a Rieske iron-sulfur protein of the mitochondrial cytochrome bc1 complex; transfers electrons from ubiquinol to cytochrome c1 during respiration                                                              |
| RPL14A | 0.242770558  | 0           | N-terminally acetylated protein component of the large (60S) ribosomal subunit                                                                                                                                                                  |
| RPL42A | 0.37139954   | 0           | Protein component of the large (60S) ribosomal subunit,                                                                                                                                                                                         |
| RPN4   | 0.058946659  | 0           | Transcription factor that stimulates expression of proteasome genes; Rpn4p levels are in turn regulated by the 26S proteasome in a negative feedback control mechanism; RPN4 is transcriptionally regulated by various stress responses         |
| RPS17A | 0.348886799  | 0.003837145 | Ribosomal protein 51 (rp51) of the small (40s) subunit                                                                                                                                                                                          |
| RPS22A | 0.387414585  | 3.33416E-11 | Protein component of the small (40S) ribosomal subunit;                                                                                                                                                                                         |
| RPS25A | 0.238556452  | 0           | Protein component of the small (40S) ribosomal subunit                                                                                                                                                                                          |
| RPS4A  | 0.389415896  | 2.36676E-08 | Protein component of the small (40S) ribosomal subunit                                                                                                                                                                                          |
| SAC1   | 0.074621214  | 0           | Phosphatidylinositol phosphate (PtdInsP) phosphatase involved in hydrolysis of PtdIns[4]P                                                                                                                                                       |
| SAC7   | 0.380757907  | 9.74423E-05 | GTPase activating protein (GAP) for Rho1p, involved in signaling to the actin cytoskeleton,                                                                                                                                                     |
| SAM37  | 0.334452537  | 7.77156E-16 | Component of the mitochondrial outer membrane sorting and assembly machinery (SAM) complex                                                                                                                                                      |
| SEL1   | 0.123216515  | 0           | Protein involved in ER-associated protein degradation                                                                                                                                                                                           |
| SHE4   | 0.075458186  | 0           | Protein containing a UCS (UNC-45/CRO1/SHE4) domain, binds to myosin motor domains to regulate myosin function; involved in endocytosis, polarization of the actin cytoskeleton, and asymmetric mRNA localization                                |
| SLA1   | 0.419715392  | 0           | Cytoskeletal protein binding protein required for assembly of the cortical actin cytoskeleton; interacts with proteins regulating actin dynamics and proteins required for endocytosis; found in the nucleus and cell cortex; has 3 SH3 domains |
| SNF12  | 0.180789803  | 3.88578E-15 | 73 kDa subunit of the SWI/SNF chromatin remodeling complex involved in transcriptional regulation                                                                                                                                               |
| SOD1   | 0.076325748  | 0           | Cytosolic superoxide dismutase; some mutations are analogous to those that cause ALS (amyotrophic lateral sclerosis) in humans                                                                                                                  |
| SPO11  | 0.23175225   | 0           | Meiosis-specific protein that initiates meiotic recombination by catalyzing the formation of double-strand breaks in DNA via a transesterification reaction                                                                                     |
| SPT10  | 0.211100813  | 0           | Putative histone acetylase, sequence-specific activator of histone genes, binds specifically and highly cooperatively to pairs of UAS elements in core histone promoters, functions at or near the TATA box                                     |
| SPT2   | 0.375103179  | 0.000801271 | Protein involved in negative regulation of transcription; required for RNA polyadenylation; exhibits regulated interactions with both histones and SWI-SNF components                                                                           |
| SPT2   | 0.39320317   | 0.000426315 | Protein involved in negative regulation of transcription; required for RNA polyadenylation; exhibits regulated interactions with both histones and SWI-SNF components,                                                                          |
| SPT20  | 0.265974532  | 6.94825E-06 | Subunit of the SAGA transcriptional regulatory complex, involved in maintaining the integrity of the complex                                                                                                                                    |
| SPT7   | 0.308176303  | 4.37098E-05 | Subunit of the SAGA transcriptional regulatory complex, involved in proper assembly of the complex                                                                                                                                              |
| SSN3   | 0.064071564  | 0           | Cyclin-dependent protein kinase, component of RNA polymerase II holoenzyme;                                                                                                                                                                     |
| SSN8   | 0.052775514  | 0           | Cyclin-like component of the RNA polymerase II holoenzyme                                                                                                                                                                                       |
| STE24  | 0.452382264  | 3.00259E-09 | Highly conserved zinc metalloprotease that functions in two steps of a-factor maturation                                                                                                                                                        |
| SWI3   | 0.159752155  | 0           | Subunit of the SWI/SNF chromatin remodeling complex, which regulates transcription by remodeling chromosomes                                                                                                                                    |
| SWP82  | 0.352135037  | 0           | Member of the SWI/SNF chromatin remodeling complex in which it plays an as yet unidentified role; has identifiable counterparts in closely related yeast species; abundantly expressed in many growth conditions                                |
| TCM62  | 0.284555762  | 0           | Protein involved in the assembly of the mitochondrial succinate dehydrogenase complex; putative chaperone                                                                                                                                       |
| TEF4   | 0.12320827   | 0           | Translation elongation factor EF-1 gamma                                                                                                                                                                                                        |
| TFP1   | 0.165397668  | 0           | Vacuolar ATPase V1 domain subunit A containing the catalytic nucleotide binding sites;                                                                                                                                                          |
| TFP3   | 0.190693983  | 0           | Vacuolar ATPase V0 domain subunit c', involved in proton transport activit                                                                                                                                                                      |
| TLG2   | 0.157675252  | 0           | Syntaxin-like t-SNARE that forms a complex with Tlg1p and Vti1p and mediates fusion of endosome-derived vesicles with the late Golgi                                                                                                            |
| TOM5   | 0.380454189  | 9.04738E-07 | Small mitochondrial outer membrane protein crucial to a binding relay for the import of proteins into mitochondria                                                                                                                              |
| TOP1   | 0.067788256  | 0           | Topoisomerase I, nuclear enzyme that relieves torsional strain in DNA by cleaving and re-sealing the phosphodiester backbone                                                                                                                    |
| TPD3   | 0.182282178  | 0           | Regulatory subunit A of the heterotrimeric protein phosphatase 2A, which also contains regulatory subunit Cdc55p and either catalytic subunit Pph21p or Pph22p; required for cell morphogenesis and for transcription by RNA polymerase III     |
| TRM9   | 0.357527351  | 0           | tRNA methyltransferase, catalyzes esterification of modified uridine nucleotides in tRNA(Arg3) and tRNA(Glu), likely as part of a complex with Trm112p; deletion confers resistance to zymocin                                                  |
| TRP1   | 0.164507258  | 0           | Phosphoribosylanthranilate isomerase that catalyzes the third step in tryptophan biosynthesis                                                                                                                                                   |
| TRP2   | 0.0982352    | 0           | Anthranilate synthase, catalyzes the initial step of tryptophan biosynthesis                                                                                                                                                                    |
| TRP3   | 0.105691851  | 0           | Bifunctional enzyme exhibiting both indole-3-glycerol-phosphate synthase and anthranilate synthase activities                                                                                                                                   |
| TRP4   | 0.080306926  | 0           | Anthranilate phosphoribosyl transferase of the tryptophan biosynthetic pathway                                                                                                                                                                  |
| UBA4   | 0.213372873  | 6.77236E-15 | Protein that activates Urm1p before its conjugation to proteins (urmylation); one target is the thioredoxin peroxidase Ahp1p, suggesting a role of urmylation in the oxidative stress response                                                  |
| UBC13  | 0.3854464871 | 0           | Ubiquitin-conjugating enzyme involved in the error-free DNA postreplication repair pathway;                                                                                                                                                     |

|           |             |             |                                                                                                                                                                                                                                                |
|-----------|-------------|-------------|------------------------------------------------------------------------------------------------------------------------------------------------------------------------------------------------------------------------------------------------|
| UBX4      | 0.34647126  | 4.5387E-12  | UBX (ubiquitin regulatory X) domain-containing protein that interacts with Cdc48p                                                                                                                                                              |
| UFD2      | 0.175300179 | 0           | Ubiquitin chain assembly factor (E4) that cooperates with a ubiquitin-activating enzyme (E1), a ubiquitin-conjugating enzyme (E2), and a ubiquitin protein ligase (E3) to conjugate ubiquitin to substrates; also functions as an E3           |
| UMP1      | 0.272116228 | 7.31637E-12 | Short-lived chaperone required for correct maturation of the 20S proteasome;                                                                                                                                                                   |
| VAN1      | 0.415352326 | 3.75255E-14 | Component of the mannan polymerase I                                                                                                                                                                                                           |
| VMA13     | 0.101306302 | 0           | Subunit H of the eight-subunit V1 peripheral membrane domain of the vacuolar H <sup>+</sup> -ATPase (V-ATPase),                                                                                                                                |
| VMA5      | 0.158692689 | 0           | Subunit C of the eight-subunit V1 peripheral membrane domain of vacuolar H <sup>+</sup> -ATPase (V-ATPase)                                                                                                                                     |
| VMA8      | 0.199478926 | 0           | Subunit D of the eight-subunit V1 peripheral membrane domain of the vacuolar H <sup>+</sup> -ATPase (V-ATPase)                                                                                                                                 |
| VPH1      | 0.161090328 | 0           | Subunit a of vacuolar-ATPase V0 domain,                                                                                                                                                                                                        |
| VPS15     | 0.313341466 | 2.24631E-10 | Myristoylated serine/threonine protein kinase involved in vacuolar protein sorting; functions as a membrane-associated complex with Vps34p                                                                                                     |
| VPS16     | 0.091857699 | 0           | Subunit of the vacuole fusion and protein sorting HOPS complex and the CORVET tethering complex                                                                                                                                                |
| VPS24     | 0.320153004 | 0           | One of four subunits of the endosomal sorting complex required for transport III (ESCRT-III); forms an ESCRT-III subcomplex with Did4p; involved in the sorting of transmembrane proteins into the multivesicular body (MVB) pathway           |
| VPS27     | 0.208046933 | 0           | Endosomal protein that forms a complex with Hse1p; required for recycling Golgi proteins, forming luminal membranes and sorting ubiquitinated proteins destined for degradation;                                                               |
| VPS3      | 0.134580741 | 0           | Component of CORVET tethering complex; cytoplasmic protein required for the sorting and processing of soluble vacuolar proteins, acidification of the vacuolar lumen, and assembly of the vacuolar H <sup>+</sup> -ATPase                      |
| VPS34     | 0.122210165 | 0           | Phosphatidylinositol 3-kinase responsible for the synthesis of phosphatidylinositol 3-phosphate; forms membrane-associated signal transduction complex with Vps15p to regulate protein sorting                                                 |
| VPS4      | 0.243602504 | 0           | AAA-ATPase involved in multivesicular body (MVB) protein sorting, ATP-bound Vps4p localizes to endosomes and catalyzes ESCRT-III disassembly and membrane release;                                                                             |
| VPS51     | 0.204593138 | 0           | Component of the GARP (Golgi-associated retrograde protein) complex                                                                                                                                                                            |
| VPS52     | 0.114381382 | 0           | Component of the GARP (Golgi-associated retrograde protein) complex, Vps51p-Vps52p-Vps53p-Vps54p, which is required for the recycling of proteins from endosomes to the late Golgi;                                                            |
| VPS53     | 0.107379217 | 0           | Component of the GARP (Golgi-associated retrograde protein) complex, Vps51p-Vps52p-Vps53p-Vps54p, which is required for the recycling of proteins from endosomes to the late Golgi                                                             |
| VPS66     | 0.133800607 | 0           | Cytoplasmic protein of unknown function involved in vacuolar protein sorting.                                                                                                                                                                  |
| VPS8      | 0.461767234 | 0           | Membrane-associated protein that interacts with Vps21p to facilitate soluble vacuolar protein localization; component of the CORVET complex; required for localization and trafficking of the CPY sorting receptor; contains RING finger motif |
| VPS9      | 0.401637094 | 5.32907E-15 | A guanine nucleotide exchange factor involved in vesicle-mediated vacuolar protein transport                                                                                                                                                   |
| YAR1      | 0.081309679 | 0           | Cytoplasmic ankyrin-repeat containing protein of unknown function, proposed to link the processes of 40S ribosomal subunit biogenesis and adaptation to osmotic and oxidative stress                                                           |
| YBR255W   | 0.177360834 | 0           | Protein of unknown function, required for normal growth rate at 15 degrees C; green fluorescent protein (GFP)-fusion protein localizes to the cytoplasm in a punctate pattern; mtc4 is synthetically sick with cdc13-1                         |
| YCK3      | 0.291332132 | 0           | Palmitoylated, vacuolar membrane-localized casein kinase I isoform; negatively regulates vacuole fusion during hypertonic stress via phosphorylation of the HOPS complex subunit,                                                              |
| YCL033C   | 0.33966797  | 0           | Putative protein-methionine-R-oxide reductase; involved in response to oxidative stress;                                                                                                                                                       |
| YCL045C   | 0.366115739 | 8.51541E-14 | Protein of unknown function, overlaps EMC1 and MGR1                                                                                                                                                                                            |
| YCR050C   | 0.176501079 | 0           | Non-essential protein of unknown function; deletion mutant is synthetically sick or lethal with alpha-synuclein, overlaps ARE1                                                                                                                 |
| YDL057W   | 0.370344179 | 0.024079705 | Putative protein of unknown function                                                                                                                                                                                                           |
| YDL183C   | 0.411322492 | 0           | Putative protein of unknown function                                                                                                                                                                                                           |
| YDL206W   | 0.237682629 | 0           | Putative protein of unknown function                                                                                                                                                                                                           |
| YDR008C   | 0.182999018 | 0           | Dubious open reading frame, overlaps TRP1                                                                                                                                                                                                      |
| YDR203W   | 0.380296141 | 4.44089E-16 | Dubious open reading frame, overlaps RAV2                                                                                                                                                                                                      |
| YDR269C   | 0.046907107 | 0           | Dubious open reading frame, overlaps ccc2                                                                                                                                                                                                      |
| YDR271C   | 0.070996629 | 0           | Dubious open reading, partially overlaps the verified ORF CCC2                                                                                                                                                                                 |
| YDR287W   | 0.347640507 | 0           | Inositol monophosphatase, involved in biosynthesis of inositol; enzymatic activity requires magnesium ions and is inhibited by lithium and sodium ions                                                                                         |
| YDR455C   | 0.131100682 | 0           | Dubious open reading, overlaps the verified gene NHX1                                                                                                                                                                                          |
| YET1      | 0.390608398 | 0           | Endoplasmic reticulum transmembrane protein; may interact with ribosomes,                                                                                                                                                                      |
| YFL015C   | 0.246587246 | 0           | Dubious open reading frame adjacent to MDJ1                                                                                                                                                                                                    |
| YFL019C   | 0.331796706 | 0           | Dubious open reading frame                                                                                                                                                                                                                     |
| YGL081W   | 0.060928748 | 0           | Putative protein of unknown function; non-essential gene; interacts genetically with CHS5, a gene involved in chitin biosynthesis                                                                                                              |
| YGL214W   | 0.118072363 | 0           | Dubious open reading, overlaps SKI8                                                                                                                                                                                                            |
| YGL218W   | 0.389249466 | 0.000272675 | Dubious open reading frame, overlaps the verified gene MDM34; deletion in cyr1 mutant results in loss of stress resistance                                                                                                                     |
| YGR064W   | 0.101236771 | 0           | Dubious open reading frame, overlaps SPT4                                                                                                                                                                                                      |
| YHR033W   | 0.147251079 | 0           | Putative protein of unknown function                                                                                                                                                                                                           |
| YHR151C   | 0.144570483 | 0           | Protein of unknown function, mtc6 is synthetically sick with cdc13-1                                                                                                                                                                           |
| YIL092W   | 0.459943553 | 0           | Putative protein of unknown function                                                                                                                                                                                                           |
| YJL142C   | 0.406398751 | 7.01973E-11 | Dubious open reading frame, partially overlaps verified gene YJL141C                                                                                                                                                                           |
| YJL175W   | 0.147948467 | 0           | Dubious open reading frame unlikely to encode a functional protein; deletion confers resistance to cisplatin, hypersensitivity to 5-fluorouracil, and growth defect at high pH with high calcium; overlaps gene for SWI3 transcription factor  |
| YJR020W   | 0.307685784 | 0.001791415 | Dubious open reading frame, overlaps TES1                                                                                                                                                                                                      |
| YKL136W   | 0.421115144 | 0           | Dubious open reading frame, partially overlaps the verified ORF APL2                                                                                                                                                                           |
| YKL169C   | 0.121094586 | 0           | Dubious open reading frame, overlaps the verified gene MRPL38                                                                                                                                                                                  |
| YLL029W   | 0.178813288 | 1.11022E-16 | Protein involved in negative regulation of transcription of iron regulon; forms an iron independent complex with Fra2p, Grx3p, and Grx4p; cytosolic; mutant fails to repress transcription of iron regulon and is defective in spore formation |
| YLR065C   | 0.426802438 | 6.51948E-07 | Putative protein of unknown function                                                                                                                                                                                                           |
| YML012C-A | 0.117247625 | 0           | Dubious open reading, overlaps SEL1                                                                                                                                                                                                            |
| YML037C   | 0.389701756 | 0           | Putative protein of unknown function with some characteristics of a transcriptional activator;                                                                                                                                                 |
| YMR057C   | 0.229292173 | 0           | Dubious open reading frame, overlaps AAC1                                                                                                                                                                                                      |
| YMR1      | 0.25359479  | 1.19885E-07 | Phosphatidylinositol 3-phosphate (PI3P) phosphatase; involved in various protein sorting pathways, including CVT targeting and endosome to vacuole transport;                                                                                  |
| YMR126C   | 0.173298609 | 0           | Protein of unknown function, mutant sensitive to 6-azauracil (6AU) and mycophenolic acid (MPA)                                                                                                                                                 |
| YNL080C   | 0.105482692 | 0           | Protein involved in N-glycosylation; deletion mutation confers sensitivity to oxidative stress and shows synthetic lethality with mutations in the spindle checkpoint genes BUB3 and MAD1                                                      |
| YNL105W   | 0.378976727 | 0           | Dubious open reading frame, overlaps the verified gene INP52                                                                                                                                                                                   |
| YNL120C   | 0.044505974 | 0           | Dubious open reading frame, enhances replication of Brome mosaic virus in <i>S. cerevisiae</i> , but likely due to effects on the overlapping gene NCS2                                                                                        |
| YOL162W   | 0.442595552 | 2.33147E-15 | Putative protein of unknown function                                                                                                                                                                                                           |
| YOR251C   | 0.152257849 | 0           | Mitochondrial protein, required for formation of the 2-thio group of the 5-methoxycarbonylmethyl-2-thiouridine modified base in some tRNAs; has similarity to mammalian thiosulfate sulfurtransferase (rhodanese)                              |
| YOR331C   | 0.16924285  | 0           | Dubious open reading frame, overlaps VMA4                                                                                                                                                                                                      |
| YPR090W   | 0.290354619 | 0           | Merged with YPR089W, unknown function                                                                                                                                                                                                          |
| YPR123C   | 0.468127409 | 0           | Hypothetical protein, overlaps CTR1                                                                                                                                                                                                            |
| YPR170C   | 0.424014092 | 0           | Dubious open reading frame, partially overlaps the dubious ORFs YPR169W-A and YPR170W-B                                                                                                                                                        |
| YPR197C   | 0.402283224 | 0           | Dubious open reading frame, overlaps SGE1                                                                                                                                                                                                      |
| YPT31     | 0.292384947 | 0           | GTPase of the Ypt/Rab family, very similar to Ypt32p; involved in the exocytic pathway; mediates intra-Golgi traffic or the budding of post-Golgi vesicles from the trans-Golgi                                                                |
| YPT7      | 0.146674597 | 0           | GTPase; GTP-binding protein of the rab family; required for homotypic fusion event in vacuole inheritance, for endosome-endosome fusion, similar to mammalian Rab7                                                                             |
| YSA1      | 0.117071919 | 0           | Nudix hydrolase family member with ADP-ribose pyrophosphatase activity                                                                                                                                                                         |
| ZAP1      | 0.280784219 | 0           | Zinc-regulated transcription factor, binds to zinc-responsive promoter elements to induce transcription of certain genes in the presence of zinc; regulates its own transcription; contains seven zinc-finger domains                          |
| ZRC1      | 0.353590889 | 0           | Vacuolar membrane zinc transporter, transports zinc from the cytosol into the vacuole for storage; also has a role in resistance to zinc shock resulting from a sudden influx of zinc into the cytoplasm                                       |
| ZUO1      | 0.332167736 | 3.71028E-07 | Cytosolic ribosome-associated chaperone that acts, together with Ssz1p and the Ssb proteins, as a chaperone for nascent polypeptide chains                                                                                                     |
